# Supplementary material for: Production of fatty acids in Ralstonia eutropha H16 by engineering β-oxidation and carbon storage
Source: PeerJ. 2015 Dec 7;3:e1468. doi: 10.7717/peerj.1468 (PMC4675107; doi:10.7717/peerj.1468)
Supplement: Supplemental Information 2 [file peerj-03-1468-s002.xlsx]

## Sheet: Sheet1
	Figure 3A
		Time (h)	0	4	8	12	25	33	50	98	150
	ReH16	Mean FFA (mg/L):	6.73002	9.34442	6.49373	6.05931	6.02051	8.58592	13.4025	6.78867	6.39415
		SEM FFA (mg/L):	0.254598	0.488327	1.49384	0.665105	0.529926	0.220203	1.11519	0.928014	3.13
	Re2303	Mean FFA (mg/L):	6.44095	9.47104	6.98796	7.78339	4.93162	9.49749	9.69422	14.5675	19.4921
		SEM FFA (mg/L):	1.25119	1.8099	0.940053	2.27828	2.22836	1.21905	4.62389	4.6756	0.404698
	ΔphaCAB	Mean FFA (mg/L):	7.85985	8.9986	8.20349	5.34373	6.59746	12.0127	13.6804	36.2255	32.2085
		SEM FFA (mg/L):	0.176885	2.7075	0.487729	0.365953	1.73853	0.641664	0.636167	3.68836	6.59159
	ΔfadD3	Mean FFA (mg/L):	5.4025	28.9355	24.4247	32.1777	34.7514	27.282	38.7835	47.7232	54.1447
		SEM FFA (mg/L):	1.16132	0.590558	1.54399	1.00741	3.24473	9.62734	1.42999	2.02136	1.27784
	Figure 3B
		Plasmid	Mean FFA (mg/L):	SEM FFA (mg/L):
	ReH16	pJC022	3.90777	1.0764
		pJC023	0.780064	1.07106
		pJC024	1.49493	1.1566
		pJC025	1.56637	0.409864
	Re2303	pJC022	3.94573	1.21512
		pJC023	2.79022	2.39385
		pJC024	0.610926	1.03003
		pJC025	0.785142	0.7326
	ΔphaCAB	pJC022	14.238	0.928629
		pJC023	31.3133	7.77303
		pJC024	25.0881	4.85725
		pJC025	9.53208	1.67337
	ΔfadD3	pJC022	17.4124	11.0533
		pJC023	8.00674	0.518999
		pJC024	56.2628	2.9806
		pJC025	38.5064	16.708
	Figure 3C
		Time (h)	0	4	8	12	24
	ReH16	Mean FFA (mg/L):	112.657	103.558	51.5729	2.68241	2.71439
		SEM FFA (mg/L):	4.59392	3.58273	2.43188	0.067216	0.447597
	Re2303	Mean FFA (mg/L):	117.578	101.411	33.0025	3.7335	2.68291
		SEM FFA (mg/L):	6.23591	8.91294	3.82952	0.685146	0.910891
	ΔphaCAB	Mean FFA (mg/L):	119.545	111.61	70.5663	5.66654	2.53756
		SEM FFA (mg/L):	5.5216	0.819991	1.40663	0.912416	1.55765
	ΔfadD3	Mean FFA (mg/L):	121.371	116.223	98.6916	63.0966	1.19959
		SEM FFA (mg/L):	4.11039	3.99702	1.28626	5.08593	1.8636
