# Supplementary material for: Production of fatty acids in Ralstonia eutropha H16 by engineering β-oxidation and carbon storage
Source: PeerJ. 2015 Dec 7;3:e1468. doi: 10.7717/peerj.1468 (PMC4675107; doi:10.7717/peerj.1468)
Supplement: Supplemental Information 4 [file peerj-03-1468-s005.xlsx]

## Sheet: Sheet1
	Supplementary Figure 1
		ReH16	Δbeta ox	ΔphaCAB	ΔfadD3	ΔphaCAB ΔfadD3	Δbeta ox ΔphaCAB
	Mean FFA (mg/L):	2.70294	-0.0742416	3.15105	11.6435	4.21271	5.39276
	SEM FFA (mg/L):	3.24073	0.273126	0.701945	0.604077	2.83653	1.18082			Δ
